# Supplementary material
Source: HighWire-hosted journal article supplement (http://www.qdcxjkg.com/highwire/filestream/113285/field_highwire_adjunct_files/0/Effet_volume_ERJ_Suppl_R1.pdf)
Supplement: Effet_volume_ERJ_Suppl_R1.pdf [file Effet_volume_ERJ_Suppl_R1.pdf]

02/07/10

**Procedure Volume is One Determinant of Center Effect in Mechanically Ventilated Patients**

**Online supplement**

02/07/10

**Figure S1.** Correlation of the specific random hospital effects versus the overall hospital random effect in the various study populations

**Figure S1**

Random hospital effect in the specific populations

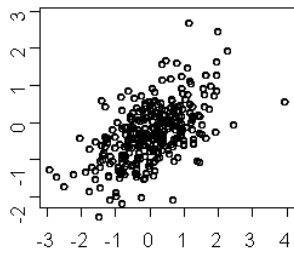

Frailty Random hospital effect in the whole study population

Random hospital effect in patients with ARDS

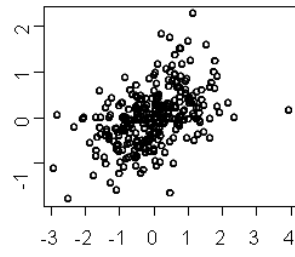

Frailty Random hospital effect in the whole study population

Random hospital effect in patients with cardiogenic shock

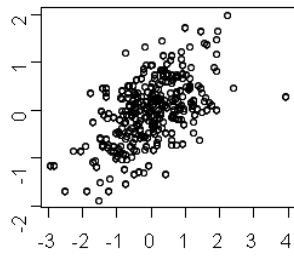

Frailty Random hospital effect in the whole study population

Random hospital effect in patients with intoxication

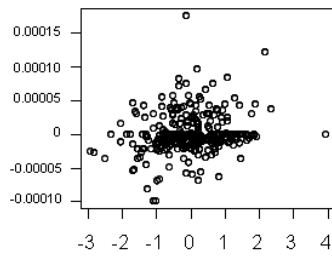

Frailty Random hospital effect in the whole study population

**Table S1: ICD-10-CM codes for the condition-specific populations**

|                                     | Number of patients | Number of hospitals | ICD-101-CM Codes    | Exclusion                                           |
|-------------------------------------|--------------------|---------------------|---------------------|-----------------------------------------------------|
| Acute respiratory distress syndrome | 13,888             | 280                 | J96.0               | A41.9, R40.2, I50.1 and I46.9 as the main diagnosis |
| Cardiogenic shock                   | 11,651             | 290                 | R57.0               |                                                     |
| Intoxications                       | 7,583              | 281                 | T42.4, T43.0, T43.5 |                                                     |
